# Supplementary material for: Linking Early Life Hypothalamic–Pituitary–Adrenal Axis Functioning, Brain Asymmetries, and Personality Traits in Dyslexia: An Informative Case Study
Source: PubMed Central journal article supplement (PMC6779713; doi:10.3389/fnhum.2019.00327), 2019-10-01
Supplement: Data_Sheet_2.pdf [file Data_Sheet_2.pdf]

# CERES Volumetry Report. version 1.0 release 12-04-2016

| Patient ID | Sex  | Age | Report Date |
|------------|------|-----|-------------|
| job8313    | Male | 56  | 14-Apr-2016 |

## Image Information

|                                              |              |
|----------------------------------------------|--------------|
| Orientation                                  | radiological |
| Scale factor                                 | 0.77         |
| SNR                                          | 23.28        |
| Total intracranial volume (cm <sup>3</sup> ) | 1400.67      |

| Volumes               | Total (cm <sup>3</sup> /%)               | Right (cm <sup>3</sup> /%)               | Left (cm <sup>3</sup> /%)                | Asym.(%)                               |
|-----------------------|------------------------------------------|------------------------------------------|------------------------------------------|----------------------------------------|
| <i>Cerebellum</i>     | 123.61 (8.8250)<br>[7.5568, 10.2191]     | 61.91 (4.4198)<br>[3.7565, 5.0920]       | 61.70 (4.4053)<br>[3.7911, 5.1362]       | 0.3297<br>[-4.3444, 2.5936]            |
| <i>Lobule I-II</i>    | 0.17 (0.0118)<br>[-0.0023, 0.0259]       | 0.07 (0.0053)<br>[-0.0030, 0.0156]       | 0.09 (0.0065)<br>[0.0002, 0.0107]        | -21.3953<br>[-51.8747, 62.8885]        |
| <i>Lobule III</i>     | 1.68 (0.1199)<br>[0.0682, 0.1471]        | 0.80 (0.0573)<br>[0.0319, 0.0738]        | 0.88 (0.0626)<br>[0.0331, 0.0764]        | -8.8787<br>[-31.8751, 25.3507]         |
| <i>Lobule IV</i>      | 4.06 (0.2901)<br>[0.2189, 0.4226]        | 2.02 (0.1445)<br>[0.1097, 0.2167]        | 2.04 (0.1455)<br>[0.1014, 0.2137]        | -0.6813<br>[-20.5661, 27.6084]         |
| <i>Lobule V</i>       | <b>8.74 (0.6242)</b><br>[0.2189, 0.4226] | <b>4.50 (0.3212)</b><br>[0.1097, 0.2167] | <b>4.24 (0.3030)</b><br>[0.1014, 0.2137] | <b>5.8570</b><br>[-20.5661, 27.6084]   |
| <i>Lobule VI</i>      | 14.17 (1.0114)<br>[0.9112, 1.5182]       | 6.84 (0.4882)<br>[0.4493, 0.7588]        | 7.33 (0.5231)<br>[0.4482, 0.7731]        | -6.9040<br>[-16.0585, 14.1819]         |
| <i>Lobule Crus I</i>  | 28.37 (2.0257)<br>[1.3328, 2.2622]       | 14.30 (1.0209)<br>[0.6396, 1.1271]       | 14.07 (1.0048)<br>[0.6719, 1.1565]       | 1.5826<br>[-19.0268, 12.0804]          |
| <i>Lobule Crus II</i> | 14.71 (1.0502)<br>[0.7886, 1.4683]       | 8.17 (0.5830)<br>[0.3832, 0.7304]        | 6.54 (0.4673)<br>[0.3863, 0.7570]        | <b>22.0364</b><br>[-22.4576, 17.6638]  |
| <i>Lobule VIIB</i>    | 7.88 (0.5627)<br>[0.4507, 0.8272]        | 4.32 (0.3083)<br>[0.2137, 0.4223]        | 3.56 (0.2544)<br>[0.2175, 0.4244]        | 19.1786<br>[-28.6581, 26.7682]         |
| <i>Lobule VIIIA</i>   | 11.09 (0.7921)<br>[0.6270, 1.0234]       | 5.45 (0.3889)<br>[0.3051, 0.5191]        | 5.65 (0.4033)<br>[0.2974, 0.5287]        | -3.6313<br>[-23.8066, 24.0274]         |
| <i>Lobule VIIIB</i>   | 9.30 (0.6638)<br>[0.4240, 0.7684]        | 3.80 (0.2713)<br>[0.2044, 0.3996]        | <b>5.50 (0.3924)</b><br>[0.1982, 0.3902] | <b>-36.4869</b><br>[-25.3966, 30.7348] |
| <i>Lobule IX</i>      | 6.64 (0.4738)<br>[0.3371, 0.7044]        | 3.22 (0.2300)<br>[0.1628, 0.3477]        | 3.42 (0.2438)<br>[0.1718, 0.3592]        | -5.8387<br>[-15.8072, 7.6460]          |
| <i>Lobule X</i>       | <b>1.18 (0.0844)</b><br>[0.3371, 0.7044] | <b>0.59 (0.0419)</b><br>[0.1628, 0.3477] | <b>0.60 (0.0425)</b><br>[0.1718, 0.3592] | <b>-1.5605</b><br>[-15.8072, 7.6460]   |

\*All the volumes are presented in absolute value (measured in cm<sup>3</sup>) and in relative value (measured in relation to the ICV).

\*The Asymmetry Index is calculated as the difference between right and left volumes divided by their mean (in percent).

\*Cortical thickness is given in absolute value (mm) and also normalized in relation to the cube root of the intracranial volume (adimensional).

\*Result images located in the MNI space (neurological orientation).

| <b>Grey matter vol.</b> | <b>Total (cm<sup>3</sup>/%)</b>          | <b>Right (cm<sup>3</sup>/%)</b>           | <b>Left (cm<sup>3</sup>/%)</b>           | <b>Asym.(%)</b>                        |
|-------------------------|------------------------------------------|-------------------------------------------|------------------------------------------|----------------------------------------|
| <i>Cerebellum</i>       | 89.32 (6.3768)<br>[5.2813, 7.8043]       | 44.80 (3.1987)<br>[2.6287, 3.8817]        | 44.52 (3.1781)<br>[2.6433, 3.9318]       | 0.6439<br>[-5.5657, 3.6764]            |
| <i>Lobule I-II</i>      | 0.11 (0.0079)<br>[-0.0035, 0.0192]       | 0.05 (0.0033)<br>[-0.3395, 0.0117]        | 0.06 (0.0046)<br>[-0.0004, 0.0079]       | -43.3529<br>[-90.2092, 81.4354]        |
| <i>Lobule III</i>       | 1.41 (0.1006)<br>[0.0516, 0.1227]        | 0.66 (0.0474)<br>[2.4521, 0.0622]         | 0.75 (0.0532)<br>[0.0244, 0.0632]        | -15.0505<br>[-38.0064, 36.2989]        |
| <i>Lobule IV</i>        | 3.67 (0.2620)<br>[0.1869, 0.3765]        | 1.86 (0.1328)<br>[9.3687, 0.1953]         | 1.81 (0.1292)<br>[0.0862, 0.1881]        | 3.6513<br>[-24.4861, 37.3067]          |
| <i>Lobule V</i>         | <b>7.75 (0.5532)</b><br>[0.1869, 0.3765] | <b>4.02 (0.2870)</b><br>[9.3687, 0.1953]  | <b>3.73 (0.2661)</b><br>[0.0862, 0.1881] | 9.8347<br>[-24.4861, 37.3067]          |
| <i>Lobule VI</i>        | 12.58 (0.8983)<br>[0.7890, 1.3715]       | 6.16 (0.4397)<br>[39.2706, 0.6896]        | 6.42 (0.4586)<br>[0.3842, 0.6940]        | -5.4681<br>[-18.6403, 19.8643]         |
| <i>Lobule Crus I</i>    | 20.44 (1.4590)<br>[0.9955, 1.8081]       | 10.28 (0.7343)<br>[48.2569, 0.9003]       | 10.15 (0.7248)<br>[0.4942, 0.9265]       | 1.6931<br>[-24.9316, 18.4447]          |
| <i>Lobule Crus II</i>   | 10.38 (0.7407)<br>[0.6017, 1.1456]       | 5.65 (0.4031)<br>[28.9278, 0.5674]        | 4.73 (0.3376)<br>[0.2954, 0.5953]        | <b>23.0162</b><br>[-31.1551, 22.0556]  |
| <i>Lobule VIIB</i>      | 6.62 (0.4727)<br>[0.3727, 0.6856]        | 3.62 (0.2586)<br>[17.3093, 0.3445]        | 3.00 (0.2142)<br>[0.1832, 0.3575]        | 24.4049<br>[-39.6971, 28.6010]         |
| <i>Lobule VIIIA</i>     | 9.75 (0.6961)<br>[0.5104, 0.8786]        | 4.88 (0.3487)<br>[24.9211, 0.4433]        | 4.87 (0.3474)<br>[0.2419, 0.4546]        | 0.4923<br>[-29.7371, 29.4163]          |
| <i>Lobule VIIIB</i>     | 8.17 (0.5832)<br>[0.3514, 0.6622]        | 3.35 (0.2391)<br>[17.0125, 0.3405]        | <b>4.82 (0.3441)</b><br>[0.1652, 0.3377] | <b>-46.8133</b><br>[-31.7603, 35.7068] |
| <i>Lobule IX</i>        | 5.76 (0.4112)<br>[0.2479, 0.5937]        | 2.77 (0.1979)<br>[11.8728, 0.2892]        | 2.99 (0.2133)<br>[0.1270, 0.3066]        | -9.7574<br>[-23.7011, 8.2414]          |
| <i>Lobule X</i>         | <b>1.15 (0.0822)</b><br>[0.2479, 0.5937] | <b>0.58 (0.0411)</b><br>[11.8728, 0.2892] | <b>0.58 (0.0411)</b><br>[0.1270, 0.3066] | -0.1738<br>[-23.7011, 8.2414]          |

\*All the volumes are presented in absolute value (measured in cm<sup>3</sup>) and in relative value (measured in relation to the ICV).

\*The Asymmetry Index is calculated as the difference between right and left volumes divided by their mean (in percent).

\*Cortical thickness is given in absolute value (mm) and also normalized in relation to the cube root of the intracranial volume (adimensional).

\*Result images located in the MNI space (neurological orientation).

| <b>Cortical thickness</b> | <b>Mean (mm/norm.)</b>         | <b>Right (mm/norm.)</b>        | <b>Left (mm/norm.)</b>         | <b>Asym.(%)</b>                |
|---------------------------|--------------------------------|--------------------------------|--------------------------------|--------------------------------|
| <i>Cerebellum</i>         | 4.39 (3.924)<br>[3.459, 4.043] | 4.37 (3.906)<br>[3.418, 4.051] | 4.41 (3.943)<br>[3.468, 4.066] | 0.9551<br>[-4.2639, 6.0397]    |
| <i>Lobule I-II</i>        | 2.71 (2.422)<br>[0.930, 3.363] | 2.80 (2.504)<br>[0.964, 3.404] | 2.64 (2.359)<br>[0.876, 3.326] | -6.0125<br>[-22.8700, 15.2214] |
| <i>Lobule III</i>         | 4.30 (3.847)<br>[2.672, 4.060] | 4.25 (3.802)<br>[2.725, 4.141] | 4.35 (3.886)<br>[2.566, 4.022] | 2.1984<br>[-15.0263, 6.5772]   |
| <i>Lobule IV</i>          | 4.93 (4.406)<br>[3.997, 4.593] | 4.97 (4.445)<br>[4.029, 4.630] | 4.88 (4.366)<br>[3.923, 4.590] | -1.7932<br>[-6.7078, 3.2760]   |
| <i>Lobule V</i>           | 4.94 (4.415)<br>[3.997, 4.593] | 4.96 (4.430)<br>[4.029, 4.630] | 4.92 (4.400)<br>[3.923, 4.590] | -0.6627<br>[-6.7078, 3.2760]   |
| <i>Lobule VI</i>          | 4.87 (4.351)<br>[3.889, 4.558] | 4.83 (4.317)<br>[3.883, 4.599] | 4.90 (4.383)<br>[3.857, 4.553] | 1.5034<br>[-6.1518, 4.4138]    |
| <i>Lobule Crus I</i>      | 3.92 (3.500)<br>[2.901, 3.935] | 3.94 (3.521)<br>[2.851, 3.945] | 3.89 (3.479)<br>[2.858, 4.003] | -1.2146<br>[-11.7450, 13.5573] |
| <i>Lobule Crus II</i>     | 3.25 (2.904)<br>[2.430, 3.791] | 3.15 (2.811)<br>[2.183, 3.754] | 3.37 (3.016)<br>[2.553, 3.927] | 7.0566<br>[-9.9144, 27.9915]   |
| <i>Lobule VIIB</i>        | 4.58 (4.093)<br>[3.240, 4.321] | 4.60 (4.112)<br>[2.975, 4.369] | 4.55 (4.070)<br>[3.406, 4.347] | -1.0322<br>[-7.8078, 19.1444]  |
| <i>Lobule VIIIA</i>       | 4.81 (4.296)<br>[3.555, 4.412] | 4.88 (4.360)<br>[3.484, 4.484] | 4.73 (4.230)<br>[3.544, 4.415] | -3.0259<br>[-9.4583, 9.2834]   |
| <i>Lobule VIIIB</i>       | 4.95 (4.424)<br>[3.665, 4.542] | 4.93 (4.409)<br>[3.643, 4.625] | 4.96 (4.433)<br>[3.542, 4.601] | 0.5416<br>[-14.3045, 11.2217]  |
| <i>Lobule IX</i>          | 4.59 (4.101)<br>[2.553, 4.113] | 4.56 (4.078)<br>[2.435, 4.054] | 4.61 (4.122)<br>[2.601, 4.225] | 1.0667<br>[-7.8679, 18.2528]   |
| <i>Lobule X</i>           | 3.47 (3.104)<br>[2.553, 4.113] | 3.71 (3.312)<br>[2.435, 4.054] | 3.22 (2.882)<br>[2.601, 4.225] | -13.8273<br>[-7.8679, 18.2528] |

\*All the volumes are presented in absolute value (measured in cm<sup>3</sup>) and in relative value (measured in relation to the ICV).

\*The Asymmetry Index is calculated as the difference between right and left volumes divided by their mean (in percent).

\*Cortical thickness is given in absolute value (mm) and also normalized in relation to the cube root of the intracranial volume (adimensional).

\*Result images located in the MNI space (neurological orientation).

### Intracranial cavity extraction

---

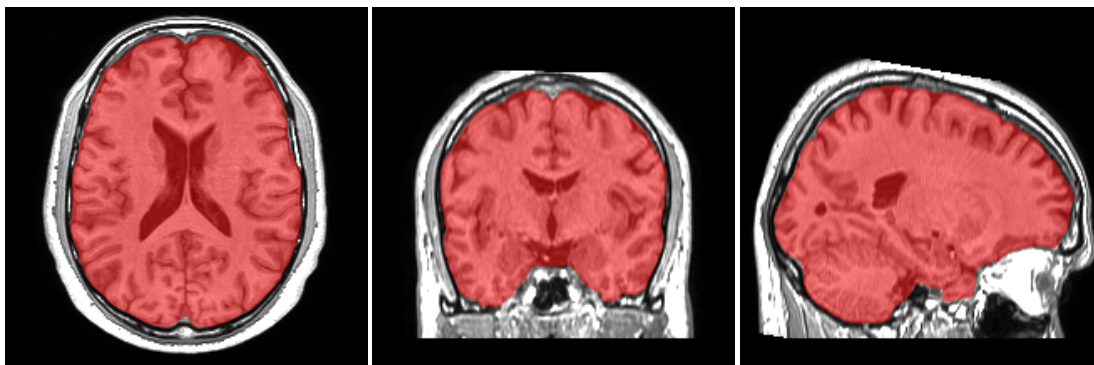

### Lobules segmentation

---

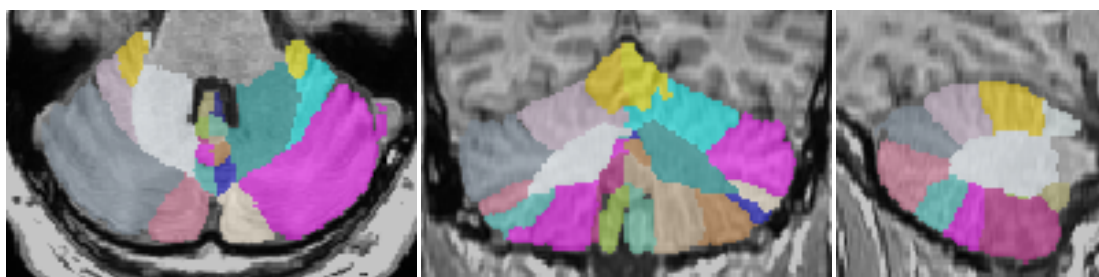

### Tissue classification

---

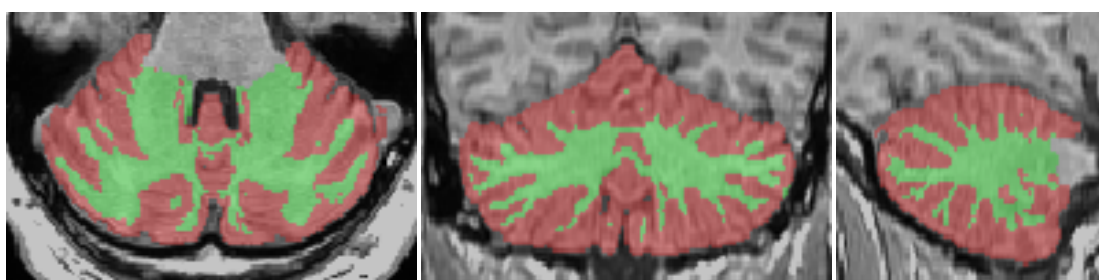

### Cortical thickness

---

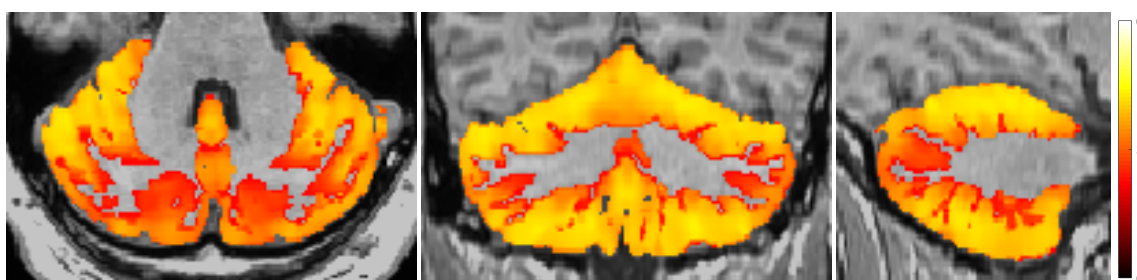

\*All the volumes are presented in absolute value (measured in  $\text{cm}^3$ ) and in relative value (measured in relation to the ICV).

\*The Asymmetry Index is calculated as the difference between right and left volumes divided by their mean (in percent).

\*Cortical thickness is given in absolute value (mm) and also normalized in relation to the cube root of the intracranial volume (adimensional).

\*Result images located in the MNI space (neurological orientation).
