# Supplementary material for: Linking Early Life Hypothalamic–Pituitary–Adrenal Axis Functioning, Brain Asymmetries, and Personality Traits in Dyslexia: An Informative Case Study
Source: PubMed Central journal article supplement (PMC6779713; doi:10.3389/fnhum.2019.00327), 2019-10-01

# SUPPLEMENTARY FIGURE 1

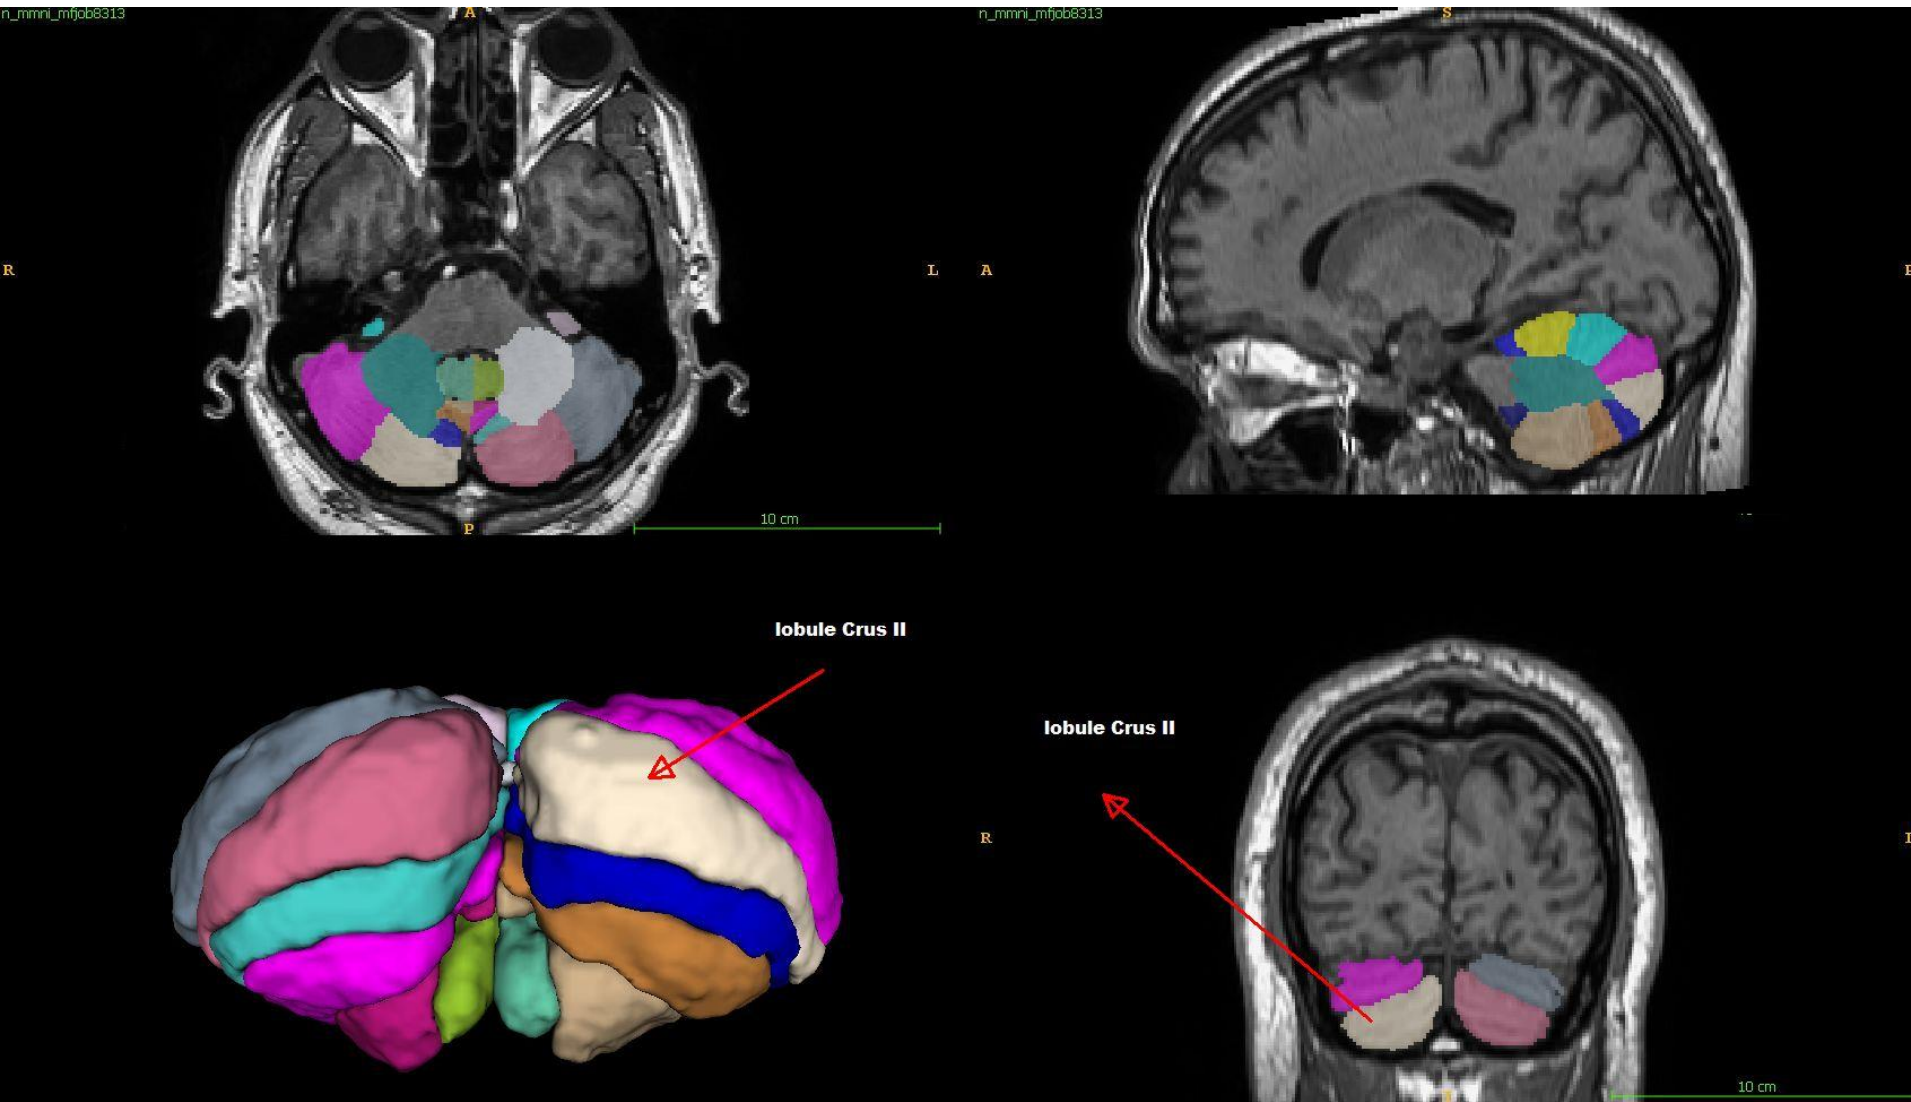

Supplement: Image_1.pdf [file Image_1.pdf]
