# Supplementary material for: Linking Early Life Hypothalamic–Pituitary–Adrenal Axis Functioning, Brain Asymmetries, and Personality Traits in Dyslexia: An Informative Case Study
Source: PubMed Central journal article supplement (PMC6779713; doi:10.3389/fnhum.2019.00327), 2019-10-01
Supplement: Table_1.pdf [file Table_1.pdf]

**SUPPLEMENTARY TABLE 1** Volumetric brain analysis.

| Tissue type                |                             | Volume ( $cm^3/\%$ ) |                     | Image information  |                |                |
|----------------------------|-----------------------------|----------------------|---------------------|--------------------|----------------|----------------|
| White Matter (WM)          | 554.66 (39.52%)             | [31.95- 44.17]       |                     | Orientation        | radiological   |                |
| Grey Matter (GM)           | 683.35 (48.69%)             | [40.96-52.24]        |                     | Scale factor       | 0.77           |                |
| Cerebro Spinal Fluid (CSF) | 165.53 (11.79%)             | [10.03- 20.64]       |                     | SNR                | 39.76          |                |
| Brain (WM + GM)            | 1238.01 (88.21%)            | [79.36- 89.97]       |                     |                    |                |                |
| Intracranial Cavity (IC)   | 1403.55 (100.00%)           |                      |                     |                    |                |                |
| Structure                  |                             |                      |                     |                    |                |                |
| Cerebrum                   | Total ( $cm^3/\%$ )         | Right ( $cm^3/\%$ )  |                     | Left ( $cm^3/\%$ ) | Asym.(%)       |                |
|                            | 1081.15 (77.03%)            | 539.46 (38.44%)      |                     | 541.69 (38.59%)    | -0.4131        |                |
|                            | [68.52 - 78.61]             | [34.27 - 39.46]      |                     | [34.21 - 39.19]    | [-1.24 - 2.15] |                |
|                            | GM                          | WM                   | GM                  | WM                 | GM             | WM             |
|                            | 583.73                      | 497.43               | 292.36              | 247.10             | 291.37         | 250.33         |
|                            | (41.59%)                    | (35.44%)             | (20.83%)            | (17.61%)           | (20.76%)       | (17.84%)       |
|                            | [34.55- 44.06]              | [28.87-39.65]        | [17.28- 22.06]      | [14.44- 19.95]     | [17.25-22.01]  | [14.41- 19.72] |
| Cerebellum                 | Total ( $cm^3/\%$ )         | Right ( $cm^3/\%$ )  |                     | Left ( $cm^3/\%$ ) | Asym.(%)       |                |
|                            | 133.44 (9.51%)              | 66.23 (4.72%)        |                     | 67.21 (4.79%)      | -1.4680        |                |
|                            | [8.11- 10.66]               | [4.02- 5.35]         |                     | [4.06- 5.33]       | [-5.17- 4.62]  |                |
|                            | GM                          | WM                   | GM                  | WM                 | GM             | WM             |
|                            | 93.25                       | 40.19                | 44.88               | 21.35              | 48.37          | 18.84          |
|                            | (6.64%)                     | (2.86%)              | (3.20%)             | (1.52%)            | (3.45%)        | (1.34%)        |
|                            | [5.64- 8.30]                | [1.56- 3.26]         | [2.76- 4.13]        | [0.79- 1.69]       | [2.87- 4.19]   | [0.76-1.58]    |
| Brainstem                  | Total ( $cm^3/\%$ )         |                      |                     |                    |                |                |
|                            | 23.50 (1.67%) [1.47 - 1.97] |                      |                     |                    |                |                |
| Structure                  | Total ( $cm^3/\%$ )         | Right ( $cm^3/\%$ )  | Left ( $cm^3/\%$ )  | Asymmetry (%)      |                |                |
| Lateral ventricles         | 16.94 (1.21%)               | 6.31 (0.45%)         | 10.63 (0.76%)       | -50.9779           |                |                |
|                            | [0.01-2.44]                 | [0.00-1.23]          | [0.01- 1.26]        | [-68.9071-54.97]   |                |                |
| Caudate                    | 7.61 (0.54%)                | 3.94 (0.28%)         | 3.67 (0.26%)        | 6.9871             |                |                |
|                            | [0.37-0.56]                 | [0.19- 0.28]         | [0.18-0.28]         | [-5.3096-9.65]     |                |                |
| Putamen                    | 7.34 (0.52%)                | 3.71 (0.26%)         | 3.63 (0.26%)        | 2.2213             |                |                |
|                            | [0.44-0.65]                 | [0.22-0.32]          | [0.22-0.33]         | [-7.5205- 4.99]    |                |                |
| Thalamus                   | 10.16 (0.72%)               | 5.09 (0.36%)         | 5.07 (0.36%)        | 0.4994             |                |                |
|                            | [0.64-0.85]                 | [0.32-0.42]          | [0.32-0.43]         | [-8.8083-5.47]     |                |                |
| Globus Pallidus            | 2.08 (0.15%)                | 1.01 (0.07%)         | 1.07 (0.08%)        | -6.5755            |                |                |
|                            | [0.13-0.20]                 | [0.06-0.10]          | [0.06-0.10]         | [-11.4260- 13.27]  |                |                |
| Hippocampus                | 8.14 (0.58%)                | 3.99 (0.28%)         | 4.15 (0.30%)        | -3.9290            |                |                |
|                            | [0.46-0.65]                 | [0.23-0.33]          | [0.23-0.32]         | [-8.9401- 13.08]   |                |                |
| Amygdala                   | <b>1.20 (0.08%)</b>         | 0.72 (0.05%)         | <b>0.48 (0.03%)</b> | <b>39.5900</b>     |                |                |
|                            | [0.09-0.14]                 | [0.04-0.07]          | [0.05- 0.07]        | [-16.4169- 18.62]  |                |                |
| Accumbens                  | 0.60 (0.04%)                | 0.29 (0.02%)         | 0.31 (0.02%)        | -8.9400            |                |                |
|                            | [0.03- 0.06]                | [0.01-0.03]          | [0.01- 0.03]        | [-40.4389-12.99]   |                |                |

\* Normalization according to normal matched control to sex and age. The significant differences are marked with red color.

\* All the volumes are presented in absolute value (measured in  $cm^3$ ) and in relative value (measured in relation to the ICV).

\* The Asymmetry Index is calculated as the difference between right and left volumes divided by their mean (in percent).

\* Expected lower and upper bounds (95%) of normalized volume in function of sex and age for each measure are provided (between brackets) for reference purpose.
