# Supplementary material for: Linking Early Life Hypothalamic–Pituitary–Adrenal Axis Functioning, Brain Asymmetries, and Personality Traits in Dyslexia: An Informative Case Study
Source: PubMed Central journal article supplement (PMC6779713; doi:10.3389/fnhum.2019.00327), 2019-10-01
Supplement: Table_2.pdf [file Table_2.pdf]

**SUPPLEMENTARY TABLE 2** Primer sequences used for reverse transcription-PCR.

| <b>Gene name</b>                                                               | <b>NCBI Reference Sequence</b> | <b>Sequence (5' - 3')</b>                         |
|--------------------------------------------------------------------------------|--------------------------------|---------------------------------------------------|
| <i>NR3C1</i><br><i>nuclear receptor subfamily</i><br><i>3 group C member 1</i> | NM_001204264.1                 | TGAAATGGGCAAAGGCGATACC<br>GGTCATACATGCAGGGTAGAGT  |
| <i>NR3C2</i><br><i>nuclear receptor subfamily</i><br><i>3 group C member 2</i> | NM_000901.4                    | GTGTCCCAACAATTCTGGGCAG<br>GACTCCACCTTGGGCAGCT     |
| <i>UBE3A</i><br><i>ubiquitin protein ligase E3A</i>                            | NM_130838.1                    | GGCTTTTCGGAGAGGTTTTCAT<br>CAGAGTCCCTGGTATAGCCACC  |
| <i>GILZ</i><br><i>TSC22 domain family</i><br><i>member 3 (TSC22D3)</i>         | NM_198057.2                    | CAAGATTGAGCAGGCCATGGA<br>TGGCTCTTCAGGGCTCAGC      |
| <i>BDNF</i><br><i>brain-derived neurotrophic</i><br><i>factor</i>              | NM_170735.5                    | TGAGTCTCCAGGACAGCAAAGC<br>GTGGACGTTTACTTCTTTCATGG |
| <i>β-actin</i>                                                                 | NM_001101.3                    | TTGCTGACAGGATGCAGAAG<br>ACATCTGCTGGAAGGTGGAC      |
| <i>GAPDH</i>                                                                   | NM_002046.5                    | GTGGTCTCCTCTGACTTCAACA<br>ACCACCCTGTTGCTGTAGCC    |
